# Supplementary material for: Invariance (?) of Mutational Parameters for Relative Fitness Over 400 Generations of Mutation Accumulation in Caenorhabditis elegans
Source: PubMed Central journal article supplement (PMC3516472; doi:10.1534/g3.112.003947), 2012-12-01
Supplement: supp_2.12.1497_003947SI.pdf [file supp_2.12.1497_003947SI.pdf]

**File S1**  
**Raw Fitness Data**

Available for download at <http://www.g3journal.org/lookup/suppl/doi:10.1534/g3.112.003947/-/DC1>.

**Table S1**

A)

```
PROC MIXED COVTEST DATA=<all data except line 579.1 only, not line 579>;  
  CLASS Fitness Treatment Line Subline Replicate;  
  MODEL w=Gmax Gmax*Fitness/DDFM=Kenwardroger;  
  RANDOM Line/GROUP=Fitness*Treatment;  
  RANDOM Subline(Line)/Group=Fitness*Treatment;  
  REPEATED Replicate(Line Subline)/GROUP=Fitness*Treatment;  
RUN;
```

In these analyses we included only the data for the re-assay of line 579 (i.e., "line 579.1"); doing so makes the comparison of the means of the different fitness groups more liberal and the estimate of the among-line variances more conservative; see Tables 1 and 2 in the main text. Variable names are: Fitness (1° High fitness vs. Low fitness), Treatment (G250 ancestral control vs. G400 MA), Line (1° MA line), Subline (2° MA line), Replicate (individual), Gmax (G250 vs. G400 MA generation); note that "Treatment" and "Gmax" are the same variable represented categorically and continuously, respectively. A) SAS code for the "full model".

**Table S2 SAS code to compare among-2° sub-line variances between high-fitness and low-fitness 1° lines.**

```
PROC MIXED COVTEST DATA=<MA lines only, line 579.1 not line 579>;  
  CLASS Fitness Line Subline Replicate;  
  MODEL w*=/DDFM=Kenwardroger;  
  RANDOM Subline(Line)/Group=Fitness;  
  REPEATED Replicate(Subline)/GROUP=Line;  
RUN;
```

vs.

```
PROC MIXED COVTEST DATA=< MA lines only, line 579.1 not line 579>;  
  CLASS Fitness Treatment Line Subline Replicate;  
  MODEL w*=/DDFM=Kenwardroger;  
  RANDOM Subline(Line);  
  REPEATED Replicate(Subline)/GROUP=Line;  
RUN;
```

In the code at top, the among-subline variance is estimated separately for each fitness group (RANDOM Subline/GROUP=Fitness); in the code at bottom a single among-sub-line variance is estimated. Note that the dependent variable is  $w^*$ , relative fitness standardized to the mean of the 1° line.

**Table S3 "Going to backup", approximate effective population size ( $N_e$ ) and the demarcation of Effective Neutrality.**

| $1^\circ$ Line | $1^\circ$ Fitness | $W_0$ | $N$ backups (SE) | $N_e$ | $1/4N_e$ |
|----------------|-------------------|-------|------------------|-------|----------|
| 504            | Low               | 58.3  | 21.0 (1.7)       | 1.16  | 0.22     |
| 508            | Low               | 39.5  | 19.6 (1.5)       | 1.15  | 0.22     |
| 547            | Low               | 47.9  | 11.9 (0.8)       | 1.08  | 0.23     |
| 550            | Low               | 71.5  | 10.8 (1.0)       | 1.08  | 0.23     |
| 579            | Low               | 52.3  | 15.1 (0.8)       | 1.11  | 0.23     |
|                | Low Mean          |       | 15.7 (0.4)       | 1.12  | 0.22     |
| 522            | High              | 146.7 | 5.3 (1.0)        | 1.04  | 0.24     |
| 537            | High              | 148.8 | 4.0 (0.6)        | 1.03  | 0.24     |
| 566            | High              | 123.5 | 8.0 (1.0)        | 1.06  | 0.24     |
| 583            | High              | 123.0 | 4.8 (0.4)        | 1.03  | 0.24     |
| 587            | High              | 142.4 | 6.7 (0.8)        | 1.05  | 0.24     |
|                | High Mean         |       | 5.6 (0.5)        | 1.04  | 0.24     |

$1^\circ$  Line and  $1^\circ$  Fitness are defined in the text;  $W_0$  is mean absolute fitness of the  $1^\circ$  ancestor (from Table 1),  $N$  backups is the average number of times we "went to backup" for a  $2^\circ$  subline in that  $1^\circ$  line,  $N_e$  is the harmonic mean census size of a  $1^\circ$  line, where backup generations were assigned a census size equivalent to  $W_0$  and bottleneck generations were assigned a census size of 1. In a population that fluctuates in census size over time,  $N_e$  is equivalent to the harmonic mean census size. The parameter of effective neutrality in a MA experiment is very close to  $1/4N_e$  (Keightley and Caballero 1997), i.e., a mutation with a selection coefficient  $< 1/4N_e$  will be effectively neutral.

#### References

Keightley, P. D. and A. Caballero, 1997 Genomic mutation rates for lifetime reproductive output and lifespan in *Caenorhabditis elegans*. Proceedings of the National Academy of Sciences, USA 94: 3823–3827.
