# Supplementary material for: Invariance (?) of Mutational Parameters for Relative Fitness Over 400 Generations of Mutation Accumulation in Caenorhabditis elegans
Source: PubMed Central journal article supplement (PMC3516472; doi:10.1534/g3.112.003947), 2012-12-01
Supplement: supp_2.12.1497_TableS1.pdf [file supp_2.12.1497_TableS1.pdf]

**Table S1**

A)

```
PROC MIXED COVTEST DATA=<all data except line 579.1 only, not line 579>;  
  CLASS Fitness Treatment Line Subline Replicate;  
  MODEL w=Gmax Gmax*Fitness/DDFM=Kenwardroger;  
  RANDOM Line/GROUP=Fitness*Treatment;  
  RANDOM Subline(Line)/Group=Fitness*Treatment;  
  REPEATED Replicate(Line Subline)/GROUP=Fitness*Treatment;  
RUN;
```

In these analyses we included only the data for the re-assay of line 579 (i.e., "line 579.1"); doing so makes the comparison of the means of the different fitness groups more liberal and the estimate of the among-line variances more conservative; see Tables 1 and 2 in the main text. Variable names are: Fitness (1° High fitness vs. Low fitness), Treatment (G250 ancestral control vs. G400 MA), Line (1° MA line), Subline (2° MA line), Replicate (individual), Gmax (G250 vs. G400 MA generation); note that "Treatment" and "Gmax" are the same variable represented categorically and continuously, respectively. A) SAS code for the "full model".
