# Supplementary material for: Invariance (?) of Mutational Parameters for Relative Fitness Over 400 Generations of Mutation Accumulation in Caenorhabditis elegans
Source: PubMed Central journal article supplement (PMC3516472; doi:10.1534/g3.112.003947), 2012-12-01
Supplement: supp_2.12.1497_TableS2.pdf [file supp_2.12.1497_TableS2.pdf]

**Table S2 SAS code to compare among-2° sub-line variances between high-fitness and low-fitness 1° lines.**

```
PROC MIXED COVTEST DATA=<MA lines only, line 579.1 not line 579>;  
  CLASS Fitness Line Subline Replicate;  
  MODEL w*=/DDFM=Kenwardroger;  
  RANDOM Subline(Line)/Group=Fitness;  
  REPEATED Replicate(Subline)/GROUP=Line;  
RUN;
```

vs.

```
PROC MIXED COVTEST DATA=< MA lines only, line 579.1 not line 579>;  
  CLASS Fitness Treatment Line Subline Replicate;  
  MODEL w*=/DDFM=Kenwardroger;  
  RANDOM Subline(Line);  
  REPEATED Replicate(Subline)/GROUP=Line;  
RUN;
```

In the code at top, the among-subline variance is estimated separately for each fitness group (RANDOM Subline/GROUP=Fitness); in the code at bottom a single among-sub-line variance is estimated. Note that the dependent variable is  $w^*$ , relative fitness standardized to the mean of the 1° line.
